# Supplementary material for: A series of multi-dimensional metal–organic frameworks with trans-4,4′-azo-1,2,4-triazole: polymorphism, guest induced single-crystal-to-single-crystal transformation and solvatochromism
Source: Royal Society of Chemistry journal article supplement (doi:10.1039/c5ce00724k), 2015-01-01
Supplement: c5ce00724k1.pdf [file c5ce00724k1.pdf]

## *Supporting information*

*Table S1.* Selected hydrogen bonds lengths [Å] and angles [°] for **1-10**.

| Donor-<br>H...Acceptor     | D-H    | H...A | D...A  | D-H...A |
|----------------------------|--------|-------|--------|---------|
| <b>1</b>                   |        |       |        |         |
| O1-H1A ...S1 <sup>a</sup>  | 0.84   | 2.37  | 3.2032 | 169     |
| O1-H1B...N2 <sup>b</sup>   | 0.84   | 1.96  | 2.7943 | 172     |
| <b>2</b>                   |        |       |        |         |
| O1W-H1A ...N5 <sup>a</sup> | 0.85   | 2.16  | 3.0031 | 173     |
| O1W-H1B...N5 <sup>b</sup>  | 0.85   | 2.15  | 2.9921 | 170     |
| C2 -H9...S1 <sup>c</sup>   | 0.93   | 2.70  | 3.6206 | 171     |
| <b>3</b>                   |        |       |        |         |
| O1-H1A... N8 <sup>a</sup>  | 0.84   | 1.95  | 2.7912 | 177     |
| O1-H1B...Cl2 <sup>b</sup>  | 0.84   | 2.27  | 3.1000 | 171     |
| O2-H2A...Cl2 <sup>c</sup>  | 0.84   | 2.27  | 3.1049 | 171     |
| O2-H2B...N7 <sup>a</sup>   | 0.84   | 1.98  | 2.816  | 177     |
| O3 -H3A ...Cl2             | 0.84   | 2.45  | 3.2844 | 173     |
| O3--H3B...Cl1 <sup>d</sup> | 0.84   | 2.48  | 3.2623 | 156     |
| C3-H3...O3 <sup>e</sup>    | 0.95   | 2.43  | 3.107  | 128     |
| C4-H4...Cl2 <sup>f</sup>   | 0.95   | 2.79  | 3.5844 | 141     |
| C4-H4...O3 <sup>g</sup>    | 0.95   | 2.49  | 3.160  | 128     |
| <b>4</b>                   |        |       |        |         |
| O1-H1 ...N12 <sup>a</sup>  | 0.85   | 1.91  | 2.7528 | 173     |
| O1-H1B...O3                | 0.85   | 1.82  | 2.6553 | 166     |
| O2-H2A ...Br1              | 0.85   | 2.43  | 3.2720 | 175     |
| O2-H2B...Br1 <sup>b</sup>  | 0.85   | 2.47  | 3.3192 | 178     |
| O3-H3A ...O2 <sup>c</sup>  | 0.85   | 1.88  | 2.7231 | 170     |
| O3-H3B...N11 <sup>d</sup>  | 0.85   | 2.04  | 2.8746 | 166     |
| C2-H2...O3 <sup>e</sup>    | 0.93   | 2.36  | 3.2337 | 157     |
| <b>5</b>                   |        |       |        |         |
| O1W-H1A...N7 <sup>a</sup>  | 0.85   | 1.99  | 2.8129 | 162     |
| O1W-H1B...O2W              | 0.85   | 1.85  | 2.6894 | 169     |
| O2W-H2A...N8 <sup>b</sup>  | 0.85   | 2.06  | 2.9043 | 171     |
| O2W-H2B...F4 <sup>c</sup>  | 0.85   | 2.08  | 2.8502 | 150     |
| C1-H1...N10                | 0.9300 | 2.61  | 3.1360 | 117     |
| C2-H2...F3 <sup>d</sup>    | 0.9300 | 2.34  | 3.1956 | 153     |
| C4-H4 ...F2                | 0.9300 | 2.34  | 3.2145 | 157     |
| C5-H5 ...O2W <sup>e</sup>  | 0.9300 | 2.46  | 3.3704 | 166     |
| C6-H6...F4                 | 0.9300 | 2.49  | 3.2331 | 137     |

| <b>6</b>                    |      |      |        |     |
|-----------------------------|------|------|--------|-----|
| C3-H3···N6 <sup>a</sup>     | 0.93 | 2.52 | 3.0927 | 120 |
| C4-H4···N3 <sup>b</sup>     | 0.93 | 2.60 | 3.1544 | 118 |
| C5-H5···F2 <sup>c</sup>     | 0.93 | 2.36 | 3.2906 | 176 |
| C6-H6···F2 <sup>d</sup>     | 0.93 | 2.39 | 3.3026 | 169 |
| <b>7</b>                    |      |      |        |     |
| O1-H1A···F4 <sup>a</sup>    | 0.85 | 2.06 | 2.8935 | 166 |
| O1-H1B···F1                 | 0.85 | 2.35 | 3.1849 | 168 |
| O1-H1B···F2                 | 0.85 | 2.45 | 3.0312 | 126 |
| C2-H2···O1                  | 0.95 | 2.41 | 3.2951 | 154 |
| C3-H3···F1 <sup>b</sup>     | 0.95 | 2.39 | 3.2360 | 148 |
| C4-H4···F1                  | 0.95 | 2.54 | 3.4073 | 152 |
| C4-H4···F3                  | 0.95 | 2.53 | 3.3788 | 149 |
| C5-H5···N3 <sup>c</sup>     | 0.95 | 2.62 | 3.0894 | 111 |
| C5-H5···N7 <sup>d</sup>     | 0.95 | 2.60 | 3.1281 | 115 |
| C6-H6···N11 <sup>e</sup>    | 0.95 | 2.47 | 3.0819 | 122 |
| <b>8</b>                    |      |      |        |     |
| O5-H5A···O11 <sup>a</sup>   | 0.85 | 1.97 | 2.7470 | 151 |
| O5-H5B···O2 <sup>b</sup>    | 0.85 | 1.92 | 2.7263 | 159 |
| O6-H6A···O14                | 0.85 | 2.04 | 2.7865 | 146 |
| O6-H6B···O12                | 0.85 | 1.88 | 2.7249 | 170 |
| O7-H7···O4 <sup>b</sup>     | 0.85 | 1.97 | 2.7985 | 165 |
| O8-H8A···O1 <sup>b</sup>    | 0.85 | 1.93 | 2.7462 | 160 |
| O8-H8B···O5 <sup>c</sup>    | 0.85 | 1.98 | 2.7852 | 158 |
| O9-H9A···O6                 | 0.85 | 1.95 | 2.7842 | 166 |
| O9-H9B···O3 <sup>d</sup>    | 0.85 | 1.90 | 2.7009 | 157 |
| O10-H10···O3 <sup>a</sup>   | 0.85 | 1.96 | 2.8062 | 174 |
| O11-H11A···O7               | 0.85 | 2.05 | 2.8796 | 165 |
| O11-H11B···O8 <sup>c</sup>  | 0.85 | 1.94 | 2.7544 | 161 |
| O12-H12A···O10 <sup>e</sup> | 0.85 | 2.04 | 2.8892 | 173 |
| O12-H12B···O9 <sup>f</sup>  | 0.85 | 2.05 | 2.7716 | 142 |
| O13-H13A···O4 <sup>a</sup>  | 0.85 | 2.25 | 2.9399 | 139 |
| O13-H13B···O2               | 0.85 | 2.01 | 2.8018 | 155 |
| O14-H14A···O2 <sup>a</sup>  | 0.85 | 1.99 | 2.8356 | 171 |
| O14-H14B···O1 <sup>d</sup>  | 0.85 | 1.93 | 2.7821 | 175 |
| C1-H1···O11                 | 0.93 | 2.32 | 2.9861 | 128 |
| C1-H1···O4 <sup>b</sup>     | 0.93 | 2.43 | 2.9213 | 113 |
| C2-H2···O4 <sup>g</sup>     | 0.93 | 2.16 | 2.9588 | 143 |
| C3-H3···O13 <sup>e</sup>    | 0.93 | 2.16 | 2.9765 | 146 |
| C4-H4···O13 <sup>a</sup>    | 0.93 | 2.27 | 3.1086 | 150 |
| <b>9</b>                    |      |      |        |     |
| C2-H2···N2                  | 0.95 | 2.56 | 3.3343 | 139 |
| <b>10</b>                   |      |      |        |     |

|                         |      |      |        |     |
|-------------------------|------|------|--------|-----|
| C1-H1...N6 <sup>a</sup> | 0.93 | 2.34 | 3.2110 | 156 |
| C2-H2...O1              | 0.93 | 2.22 | 3.1477 | 173 |
| C2-H2...O1 <sup>b</sup> | 0.93 | 2.52 | 2.9173 | 106 |
| C4-H4...N2 <sup>c</sup> | 0.93 | 2.33 | 3.2328 | 165 |

Symmetry codes: For **1**: a:  $-1+x,y,z$ ; b:  $1-x,1-y,1-z$ . For **2**: a:  $x,1-y,-1/2+z$ ; b:  $1/2-x,1/2-y,-z$ ; c:  $1/2-x,-1/2+y,1/2-z$ . For **3**: a:  $1-x,2-y,1-z$ ; b:  $1+x,1+y,z$ ; c:  $x,1+y,z$ ; d:  $1-x,-1/2+y,1/2-z$ ; e:  $1-x,1-y,1-z$ ; f:  $-x,1/2+y,1/2-z$ ; g:  $-x,1-y,1-z$ . For **4**: a:  $-1+x,y,1+z$ ; b:  $2-x,1-y,-z$ ; c:  $-1+x,y,z$ ; d:  $1-x,1-y,-z$ ; e:  $x,-1+y,z$ . For **5**: a:  $x,y,1+z$ ; b:  $1-x,-y,-z$ ; c:  $-1+x,y,z$ ; d:  $1-x,1-y,-z$ ; e:  $1-x,-y,1-z$ . For **6**: a:  $1-x,1-y,-z$ ; b:  $1-x,-y,-z$ ; c:  $-x,1-y,1-z$ ; d:  $1-x,1-y,1-z$ . For **7**: a:  $1/2+x,1/2-y,1/2+z$ ; b:  $1+x,y,z$ ; c:  $2-x,-y,-z$ ; d:  $1/2+x,1/2-y,-1/2+z$ ; e:  $2-x,-y,1-z$ . For **8**: a:  $-1+x,y,z$ ; b:  $-1+x,1-y,1/2+z$ ; c:  $x,1+y,z$ ; d:  $-1+x,1+y,z$ ; e:  $1+x,y,z$ ; f:  $x,-1+y,z$ ; g:  $-1+x,-y,1/2+z$ . For **10**: a:  $x,1+y,z$ ; b:  $1-x,1-y,1-z$ ; c:  $1-x,2-y,-z$ .

**Table S2** Dihedral angles of between two triazole rings of atrz for **1-10**

| Dihedral angles between two triazole rings of atrz (°) |                  |
|--------------------------------------------------------|------------------|
| <b>1</b>                                               | 0°               |
| <b>2</b>                                               | 0°               |
| <b>3</b>                                               | 2.41(6)°         |
| <b>4</b>                                               | 0° and 12.45(8)° |
| <b>5</b>                                               | 0° and 6.77(0)°  |
| <b>6</b>                                               | 0° and 18.03(1)° |
| <b>7</b>                                               | 0°               |
| <b>8</b>                                               | 5.45(9)°         |
| <b>9</b>                                               | 0°               |
| <b>10</b>                                              | 0°               |

**Table S3** Selected Bond Lengths (Å) and Angles (°) for **1-10**

| 1                  |            |                    |            |                    |            |
|--------------------|------------|--------------------|------------|--------------------|------------|
| Fe(1)-O(1)         | 2.1049(15) | Fe(1)-O(1A)        | 2.1049(15) | Fe(1)-N(5A)        | 2.1375(17) |
| Fe(1)-N(5)         | 2.1375(17) | Fe(1)-N(1A)        | 2.2030(17) | Fe(1)-N(1)         | 2.2031(17) |
| O(1A)-Fe(1)-N(5)   | 89.77(6)   | O(1)-Fe(1)-N(5)    | 90.23(6)   | O(1)-Fe(1)-N(1)    | 86.80(6)   |
| N(5A)-Fe(1)-N(5)   | 179.999(1) | O(1)-Fe(1)-N(1A)   | 93.20(6)   | N(5)-Fe(1)-N(1)    | 87.00(7)   |
| O(1)-Fe(1)-O(1A)   | 180.0      | O(1A)-Fe(1)-N(1A)  | 86.80(6)   | N(1A)-Fe(1)-N(1)   | 180.00(8)  |
| 2                  |            |                    |            |                    |            |
| Fe(1)-O(1)         | 2.108(2)   | Fe(1)-N(1A)        | 2.115(2)   | Fe(1)-N(1)         | 2.115(2)   |
| Fe(1)-O(1A)        | 2.108(2)   | Fe(1)-N(4A)        | 2.223(2)   | Fe(1)-N(4)         | 2.223(2)   |
| O(1A)-Fe(1)-N(1)   | 90.23(9)   | O(1)-Fe(1)-N(1)    | 89.77(9)   | N(1A)-Fe(1)-N(1)   | 180.00(11) |
| N(1)-Fe(1)-N(4A)   | 88.29(9)   | O(1)-Fe(1)-N(4A)   | 89.47(8)   | N(1)-Fe(1)-N(4)    | 91.71(9)   |
| O(1)-Fe(1)-O(1A)   | 180.0      | O(1)-Fe(1)-N(4)    | 90.53(8)   | N(4A)-Fe(1)-N(4)   | 180.0      |
| 3                  |            |                    |            |                    |            |
| Fe(1)-O(1)         | 2.0791(13) | Fe(1)-O(1A)        | 2.0791(13) | Fe(1)-N(3B)        | 2.2162(15) |
| Fe(1)-N(3C)        | 2.2162(15) | Fe(1)-Cl(1A)       | 2.4865(4)  | Fe(1)-Cl(1)        | 2.4865(4)  |
| Fe(2)-O(2)         | 2.0869(13) | Fe(2)-O(2C)        | 2.0869(13) | Fe(2)-N(2)         | 2.2006(15) |
| Fe(2)-N(2C)        | 2.2006(15) | Fe(2)-Cl(1)        | 2.4934(4)  | Fe(2)-Cl(1C)       | 2.4934(4)  |
| O(1)-Fe(1)-O(1A)   | 179.999(1) | O(1)-Fe(1)-Cl(1A)  | 90.65(4)   | O(1)-Fe(1)-Cl(1)   | 89.34(4)   |
| O(1A)-Fe(1)-Cl(1)  | 90.66(4)   | N(3B)-Fe(1)-Cl(1)  | 90.98(4)   | N(3C)-Fe(1)-Cl(1)  | 89.01(4)   |
| Cl(1A)-Fe(1)-Cl(1) | 180        | O(1A)-Fe(1)-N(3C)  | 88.53(5)   | O(1)-Fe(1)-N(3C)   | 91.48(5)   |
| O(2)-Fe(2)-Cl(1)   | 89.36(4)   | O(2C)-Fe(2)-Cl(1)  | 90.64(4)   | N(2C)-Fe(2)-Cl(1)  | 88.83(4)   |
| O(1A)-Fe(1)-N(3B)  | 91.47(5)   | N(2)-Fe(2)-Cl(1)   | 91.17(4)   | O(2)-Fe(2)-Cl(1C)  | 90.64(4)   |
| N(2)-Fe(2)-Cl(1C)  | 88.83(4)   | N(2C)-Fe(2)-Cl(1C) | 91.17(4)   | O(2C)-Fe(2)-Cl(1C) | 89.36(4)   |
| O(1)-Fe(1)-N(3B)   | 88.52(5)   | O(2)-Fe(2)-O(2C)   | 180        | Cl(1)-Fe(2)-Cl(1C) | 180.0      |
| 4                  |            |                    |            |                    |            |
| Fe(1)-O(1A)        | 2.0455(19) | Fe(1)-O(1)         | 2.0455(19) | Fe(1)-N(1)         | 2.189(2)   |
| Fe(1)-N(1A)        | 2.189(2)   | Fe(1)-N(5)         | 2.207(2)   | Fe(1)-N(5A)        | 2.207(2)   |
| N(1)-Fe(1)-N(5)    | 91.20(9)   | O(1)-Fe(1)-N(1)    | 90.83(9)   | N(1A)-Fe(1)-N(5)   | 88.80(9)   |
| N(1)-Fe(1)-N(5A)   | 88.80(9)   | O(1A)-Fe(1)-N(5)   | 89.03(8)   | N(1A)-Fe(1)-N(5A)  | 91.20(9)   |
| O(1A)-Fe(1)-O(1)   | 180.0      | O(1)-Fe(1)-N(5)    | 90.97(8)   | N(5)-Fe(1)-N(5A)   | 179.999(1) |
| 5                  |            |                    |            |                    |            |
| Fe(1)-O(1)         | 2.069(4)   | Fe(1)-O(1A)        | 2.069(4)   | Fe(1)-N(9A)        | 2.189(4)   |
| Fe(1)-N(9)         | 2.189(4)   | Fe(1)-N(1)         | 2.206(4)   | Fe(1)-N(1A)        | 2.206(4)   |
| O(1A)-Fe(1)-N(9)   | 91.26(15)  | O(1)-Fe(1)-N(9)    | 88.74(15)  | O(1)-Fe(1)-N(1A)   | 88.54(16)  |
| N(9A)-Fe(1)-N(1)   | 90.96(15)  | N(9)-Fe(1)-N(1)    | 89.04(15)  | O(1)-Fe(1)-N(1)    | 91.46(16)  |
| O(1)-Fe(1)-O(1A)   | 179.999(1) | O(1A)-Fe(1)-N(1)   | 88.54(16)  | N(1)-Fe(1)-N(1A)   | 180.00(10) |

| <b>6</b>          |            |                   |            |                   |            |
|-------------------|------------|-------------------|------------|-------------------|------------|
| Cu(1)-N(5A)       | 2.020(3)   | Cu(1)-N(5)        | 2.020(3)   | Cu(1)-N(9A)       | 2.024(3)   |
| Cu(1)-N(9)        | 2.024(3)   | Cu(1)-N(2A)       | 2.423(4)   | Cu(1)-N(2)        | 2.423(4)   |
| N(9)-Cu(1)-N(2A)  | 89.11(15)  | N(5A)-Cu(1)-N(9)  | 90.70(14)  | N(5A)-Cu(1)-N(2)  | 89.77(14)  |
| N(5)-Cu(1)-N(9)   | 89.30(14)  | N(5)-Cu(1)-N(2)   | 90.23(14)  | N(9)-Cu(1)-N(2)   | 90.89(15)  |
| N(5A)-Cu(1)-N(5)  | 180.0      | N(5)-Cu(1)-N(2A)  | 89.77(14)  | N(2A)-Cu(1)-N(2)  | 180.0(2)   |
| <b>7</b>          |            |                   |            |                   |            |
| Cu(1)-N(2A)       | 2.0134(16) | Cu(1)-N(2)        | 2.0134(16) | Cu(1)-N(10A)      | 2.0216(17) |
| Cu(1)-N(10)       | 2.0216(17) | Cu(1)-N(8B)       | 2.3896(16) | Cu(1)-N(8C)       | 2.3896(16) |
| N(2A)-Cu(1)-N(10) | 91.31(6)   | N(10)-Cu(1)-N(8B) | 89.48(6)   | N(10)-Cu(1)-N(8C) | 90.51(6)   |
| N(2)-Cu(1)-N(10)  | 88.69(6)   | N(2)-Cu(1)-N(8C)  | 88.83(6)   | N(2A)-Cu(1)-N(2)  | 180.00(8)  |
| <b>8</b>          |            |                   |            |                   |            |
| Cu(1)-O(7)        | 1.940(4)   | Cu(1)-O(10)       | 1.961(4)   | Cu(1)-N(2A)       | 2.035(5)   |
| Cu(1)-N(7B)       | 2.042(5)   | Cu(1)-O(8)        | 2.437(5)   | Cu(1)-O(9)        | 2.571(5)   |
| Cu(2)-O(10C)      | 1.957(4)   | Cu(2)-O(7)        | 1.956(4)   | Cu(2)-N(3)        | 2.023(5)   |
| Cu(2)-N(8B)       | 2.042(5)   | Cu(2)-O(6)        | 2.463(5)   | Cu(2)-O(10)       | 1.957(4)   |
| O(7)-Cu(1)-O(8)   | 95.95(17)  | O(10)-Cu(1)-O(8)  | 88.55(17)  | O(8)-Cu(1)-O(9)   | 176.83(15) |
| N(2A)-Cu(1)-O(8)  | 85.97(18)  | O(7)-Cu(1)-O(9)   | 84.80(16)  | N(7B)-Cu(1)-O(9)  | 88.50(18)  |
| O(10)-Cu(1)-O(9)  | 90.77(16)  | O(7)-Cu(1)-O(10)  | 175.4(2)   | O(7)-Cu(2)-N(3)   | 92.94(18)  |
| N(3)-Cu(2)-O(6)   | 94.85(19)  | O(7)-Cu(2)-O(6)   | 87.49(16)  | N(3)-Cu(2)-N(8B)  | 178.8(2)   |
| <b>9</b>          |            |                   |            |                   |            |
| Zn(1)-N(5)        | 1.9314(15) | Zn(1)-N(5A)       | 1.9314(15) | Zn(1)-N(1)        | 2.0218(14) |
| Zn(1)-N(1A)       | 2.0218(14) | N(5)-Zn(1)-N(5A)  | 116.94(9)  | N(5)-Zn(1)-N(1A)  | 119.47(6)  |
| N(5)-Zn(1)-N(1)   | 99.27(6)   | N(1)-Zn(1)-N(1A)  | 102.73(8)  |                   |            |
| <b>10</b>         |            |                   |            |                   |            |
| Zn(1)-N(9)        | 1.923(2)   | Zn(1)-N(5)        | 2.101(2)   | Zn(1)-N(1)        | 2.0037(19) |
| Zn(1)-N(10)       | 1.930(2)   | N(10)-Zn(1)-N(1)  | 109.13(10) | N(10)-Zn(1)-N(5)  | 100.54(9)  |
| N(9)-Zn(1)-N(10)  | 127.71(11) | N(9)-Zn(1)-N(1)   | 116.03(9)  | N(9)-Zn(1)-N(5)   | 98.61(9)   |

<sup>a</sup>Symmetry transformations used to generate equivalent atoms: For **1**: A  $-x+2,-y+1,-z+1$ . For **2**: A  $-x+1/2,-y+5/2,-z+1$ . For **3**: A  $-x+2,-y+2,-z$ ; B  $x+1,y,z$ ; C  $-x+1,-y+2,-z$ . For **4**: A  $-x,-y,-z+1$ . For **5**: A  $-x+1,-y+1,-z+1$ . For **6**: A  $-x+1,-y,-z$ . For **7**: A  $-x+2,-y,-z$ ; B  $-x+3/2,y-1/2,-z+1/2$ ; C  $x+1/2,-y+1/2,z-1/2$ . For **8**: A  $x,y+1,z$ ; B  $x-1,-y+1,z-1/2$ ; C  $x,y-1,z$ . For **9**: A  $-x+1,y,-z+1/2$ .

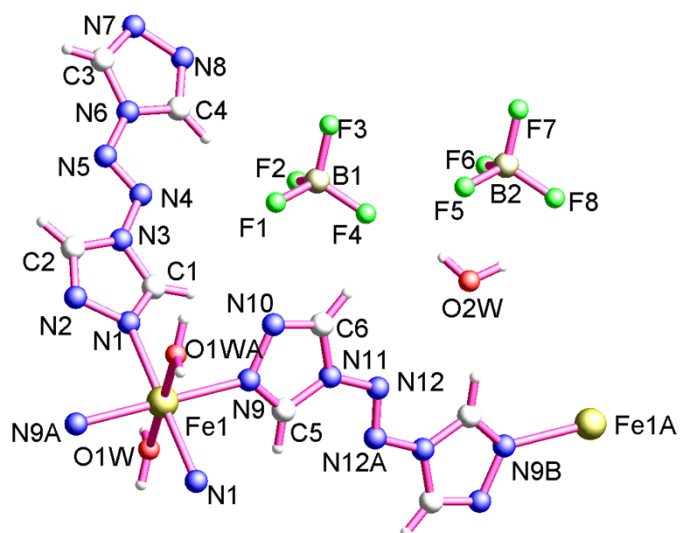

**Fig. S1** The fundamental structural unit of  $\{[\text{Fe}(\mu\text{-atrz})(\text{atrz})_2(\text{H}_2\text{O})_2] \cdot (\text{BF}_4)_2 \cdot 2\text{H}_2\text{O}\}_n$  (**4**).

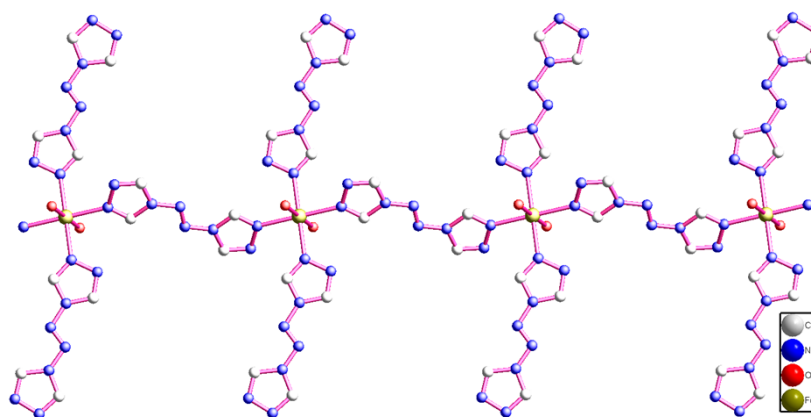

**Fig. S2** The 1D iron(II)-triazole framework  $\{[\text{Fe}(\mu\text{-atrz})(\text{atrz})_2(\text{H}_2\text{O})_2] \cdot (\text{BF}_4)_2 \cdot 2\text{H}_2\text{O}\}_n$  (**4**).

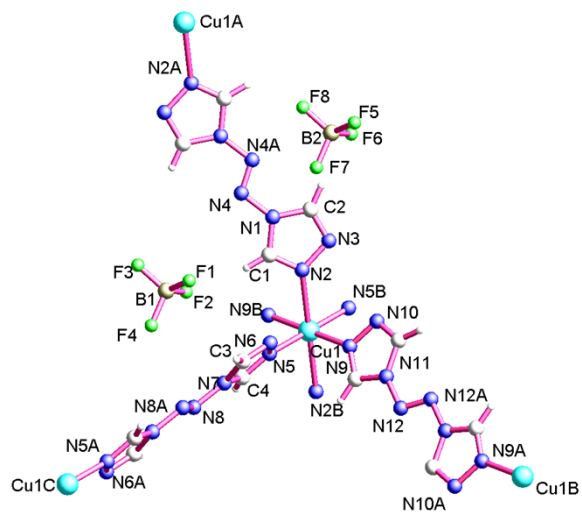

**Fig. S3** The fundamental structural unit of  $\{[\text{Cu}(\mu\text{-atrz})_3] \cdot (\text{BF}_4)_2\}_n$  (**6**).
